# Supplementary material for: The synthesis and properties of bifunctional and intelligent Fe3O4@titanium oxide core/shell nanoparticles
Source: Royal Society of Chemistry journal article supplement (doi:10.1039/c3dt32559h), 2013-01-01
Supplement: c3dt32559h.pdf [file c3dt32559h.pdf]

## *Supporting Information*

### **The synthesis and properties of bifunctional and intelligent Fe<sub>3</sub>O<sub>4</sub>@Titanium oxide core/shell nanoparticles**

**Yichao Yin<sup>1</sup>, Chenjie Liu<sup>1</sup>, Baoxiang Wang<sup>1,2,\*</sup>, Shoushan Yu<sup>1</sup>, Kezheng Chen<sup>1,\*</sup>**

**(1. College of Materials Science and Engineering,**

**Qingdao University of Science and Technology, Qingdao 266042, China**

**2. State Key Laboratory of Polymer Materials Engineering, Sichuan University,**

**Chengdu 610065, China)**

\*To whom correspondence should be addressed. Tel: 86-532-84022509.

Fax: 86-532-84022509. E-Mail: [bxwang@qust.edu.cn](mailto:bxwang@qust.edu.cn); [kchen@qust.edu.cn](mailto:kchen@qust.edu.cn).

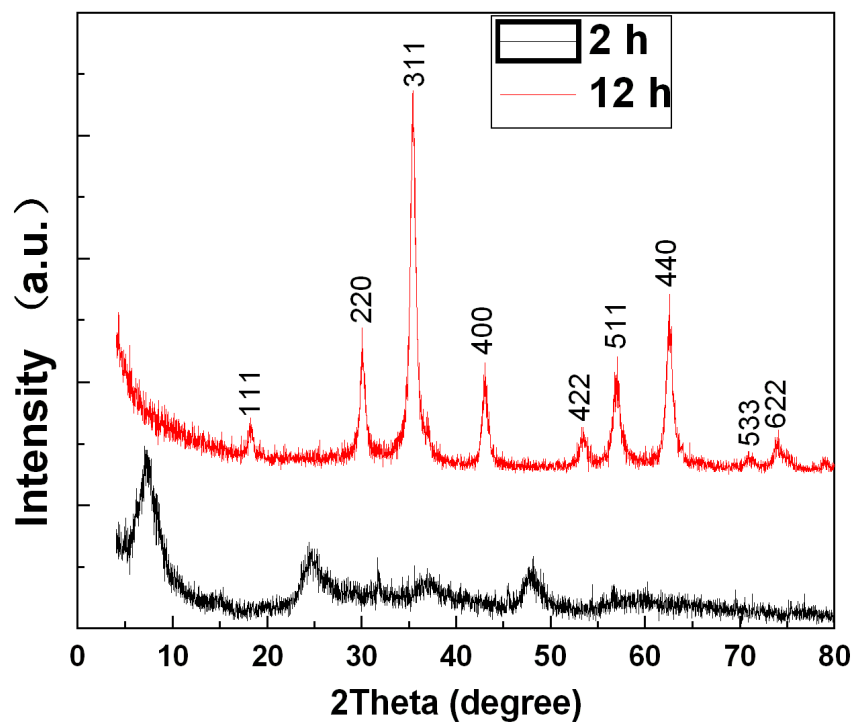

Figure S1 XRD patterns of as-obtained Fe<sub>3</sub>O<sub>4</sub> particles

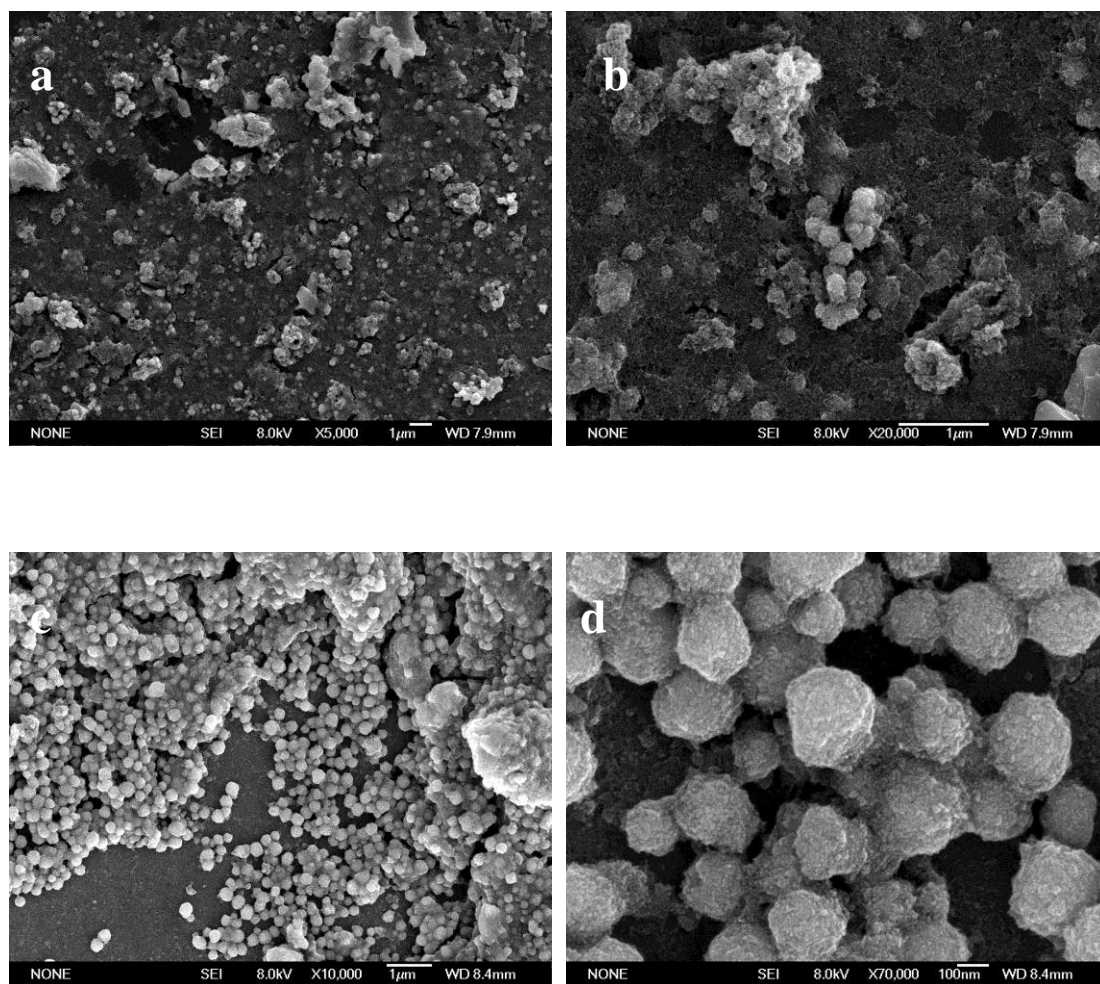

Fig.S2 The SEM images of Fe<sub>3</sub>O<sub>4</sub>/TiO<sub>2</sub> obtained via 12h solvothermal method 1 a) b) Ti / Fe =63%; c) d) Ti / Fe =38%. Other conditions are kept unchanged.

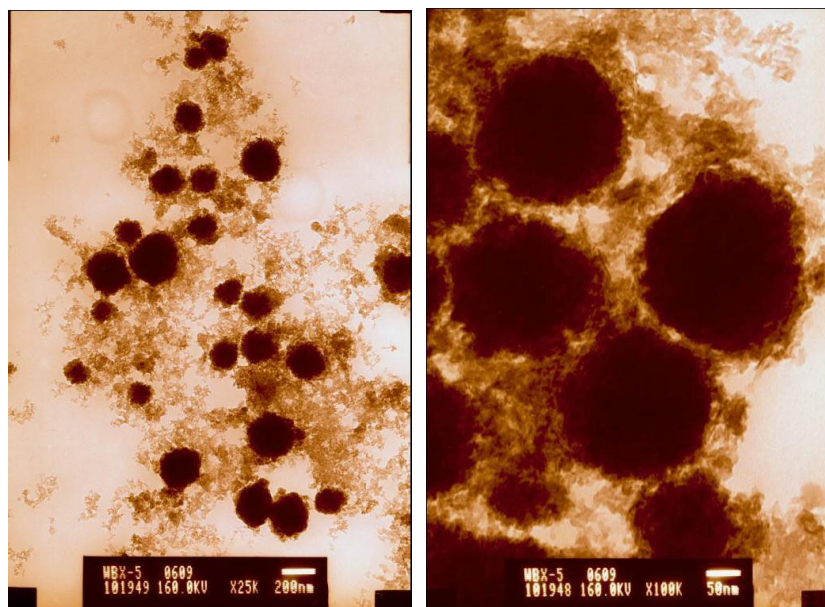

Fig.S3 The TEM photos of Fe<sub>3</sub>O<sub>4</sub>@TiO<sub>2</sub> (Ti / Fe =38%)obtained via 12h solvothermal method

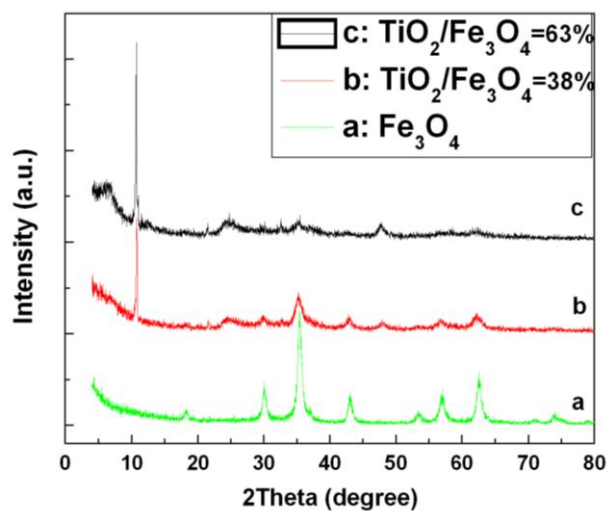

Fig.S4 XRD patterns of Fe<sub>3</sub>O<sub>4</sub>@TiO<sub>2</sub> composite with different Ti / Fe ratio via 12h solvothermal treatment: a) pure Fe<sub>3</sub>O<sub>4</sub> b) Fe<sub>3</sub>O<sub>4</sub>@TiO<sub>2</sub> composite (Ti / Fe =38%) c) Fe<sub>3</sub>O<sub>4</sub>@TiO<sub>2</sub> composite (Ti / Fe=63%)
